# Supplementary material for: Therapist-Guided Internet-Delivered Cognitive Behavioral Therapy vs Internet-Delivered Supportive Therapy for Children and Adolescents With Social Anxiety Disorder: A Randomized Clinical Trial
Source: PubMed Central journal article supplement (PMC8117054; doi:10.1001/jamapsychiatry.2021.0469), 2021-05-12
Supplement: jamapsychiatry-e210469-s003.pdf [file jamapsychiatry-e210469-s003.pdf]

## Data Sharing Statement

Nordh. Therapist-Guided Internet-Delivered Cognitive Behavioral Therapy vs Internet-Delivered Supportive Therapy for Children and Adolescents With Social Anxiety Disorder. *JAMA Psychiatry*. Published May 12, 2021. doi:10.1001/jamapsychiatry.2021.0469

### Data

**Data available:** No

### Additional Information

**Explanation for why data not available:** The datasets generated and analyzed during the current study are not publicly available due to national (Swedish) and EU legislation, but are available from the corresponding author upon reasonable request.
